# Supplementary material for: Chronic Alcohol Consumption is Inversely Associated with Insulin Resistance and Fatty Liver in Japanese Males
Source: MDPI journal article supplement (doi:10.3390/nu12041036), 2020-04-09
Supplement: s1 [file s1]

Table S1. Stanardized questionnaire

| Questions                                                                                                             |                                                                                                       |
|-----------------------------------------------------------------------------------------------------------------------|-------------------------------------------------------------------------------------------------------|
| 1. How often do you have a drink containing alcohol for the last year?                                                | 1. Never      2.      times/week                                                                      |
| 2. How much do you drink on a typical day when you are drinking?                                                      | Beer      ml/day<br>Sake      ml/day<br>Shochu      ml/day<br>Whiskey      ml/day<br>Wine      ml/day |
| 3. Do you often drink sweet beverage?                                                                                 | 1. Yes      2. No                                                                                     |
| 4. Do you often eat greasy meat?                                                                                      | 1. Yes      2. No                                                                                     |
| 5. Are you in a habit of doing exercise to sweat lightly for over 30 minutes a time, 2 times weekly, for over a year? | 1. Yes      2. No                                                                                     |
